# Supplementary material
Source: publisher figshare collection journal article supplement (https://diabetesjournals.figshare.com/articles/dataset/_/27234243)
Supplement: Supplementary file 1 [file 1]

Supplemental table S1. Characteristics of the study population according to levels of metabolic control in the 24 months after diagnosis of T2D.

| VARIABLE                                  | Total      | HbA1c <5.7% | HbA1c 5.7-6.4% | HbA1c 6.5-7.0% | HbA1c 7.1-8.0% | HbA1c >8.0%  | p-value |
|-------------------------------------------|------------|-------------|----------------|----------------|----------------|--------------|---------|
| No. of patients                           | 237635     | 12712 (5.3) | 72986 (30.7)   | 61429 (25.9)   | 58305 (24.5)   | 32203 (13.6) |         |
| Age at baseline (years)                   | 64.2±12.3  | 61.0±13.0   | 64.3±11.7      | 65.3±11.7      | 64.8±12.5      | 62.3±13.5    | <0.0001 |
| Gender (% males)                          | 56.6       | 63.8        | 57.1           | 54.2           | 56.2           | 57.9         | <0.0001 |
| BMI (kg/m <sup>2</sup> )                  | 29.9±5.6   | 29.1±5.3    | 29.6±5.4       | 29.9±5.5       | 30.1±5.7       | 30.5±6.1     | <0.0001 |
| Smoking (%)                               | 20.0       | 16.1        | 17.8           | 19.1           | 21.6           | 25.2         | <0.0001 |
| HbA1c at baseline (%)                     | 6.8±1.1    | 5.4±0.4     | 6.1±0.4        | 6.6±0.4        | 7.1±0.7        | 8.4±1.7      | <0.0001 |
| HbA1c at diagnosis (%)                    | 8.3±2.3    | 7.5±2.3     | 7.6±2.0        | 8.0±2.0        | 8.8±2.2        | 9.9±2.4      | <0.0001 |
| Total cholesterol (mg/dl)                 | 184.5±39.5 | 180.6±37.7  | 184.1±38.3     | 184.5±38.8     | 183.7±39.7     | 188.3±43.3   | <0.0001 |
| HDL cholesterol (mg/dl)                   | 49.5±13.3  | 50.3±13.9   | 50.8±13.4      | 50.0±13.2      | 48.5±13.1      | 46.8±13.1    | <0.0001 |
| LDL cholesterol (mg/dl)                   | 107.4±34.0 | 105.6±32.6  | 107.6±33.3     | 107.3±33.7     | 106.5±34.3     | 109.5±36.3   | <0.0001 |
| Triglycerides (mg/dl)                     | 143.0±87.6 | 126.3±77.0  | 132.5±76.7     | 141.0±80.2     | 148.6±88.7     | 167.4±116.4  | <0.0001 |
| Systolic blood pressure (mmHg)            | 134.1±17.9 | 132.0±17.9  | 133.4±17.6     | 134.4±17.6     | 134.9±18.1     | 134.9±18.8   | <0.0001 |
| Diastolic blood pressure (mmHg)           | 78.8±9.9   | 78.1±9.8    | 78.5±9.6       | 78.8±9.7       | 79.1±10.0      | 79.6±10.4    | <0.0001 |
| Albuminuria (%)                           | 35.6       | 30.9        | 32.5           | 34.0           | 37.9           | 43.4         | <0.0001 |
| eGFR <60 ml/min/1.73m <sup>2</sup> (%)    | 19.8       | 16.5        | 18.6           | 20.2           | 21.4           | 20.5         | <0.0001 |
| Antihypertensive medication (%)           | 51.9       | 48.0        | 53.0           | 54.2           | 52.2           | 46.3         | <0.0001 |
| Lipid-lowering medication (%)             | 40.7       | 31.6        | 40.9           | 43.8           | 41.9           | 36.1         | <0.0001 |
| Glucose-lowering medication (%)           |            |             |                |                |                |              |         |
| Metformin                                 | 62.5       | 49.9        | 53.2           | 62.0           | 72.6           | 71.5         | <0.0001 |
| Sulphonylureas                            | 11.4       | 5.9         | 5.9            | 8.2            | 15.8           | 24.0         | <0.0001 |
| Glinides                                  | 3.8        | 2.3         | 2.4            | 3.1            | 5.1            | 6.4          | <0.0001 |
| DPP4i                                     | 9.9        | 4.6         | 5.2            | 7.8            | 16.1           | 15.5         | <0.0001 |
| GLP1-RAs                                  | 2.8        | 1.6         | 1.4            | 2.0            | 4.1            | 5.8          | <0.0001 |
| SGLT2i                                    | 3.6        | 1.4         | 1.8            | 2.9            | 5.2            | 6.9          | <0.0001 |
| Thiazolidinediones                        | 2.7        | 1.4         | 1.6            | 2.2            | 3.9            | 4.3          | <0.0001 |
| Acarbose                                  | 1.9        | 0.9         | 1.2            | 1.7            | 2.7            | 2.7          | <0.0001 |
| Insulin                                   | 18.0       | 13.8        | 9.5            | 10.8           | 22.0           | 45.7         | <0.0001 |
| Follow-up (years)                         | 4.5±2.7    | 4.5±2.7     | 4.5±2.7        | 4.5±2.7        | 4.4±2.7        | 4.4±2.7      | <0.0001 |
| Composite CV Outcome                      | 5.4        | 3.5         | 4.9            | 5.6            | 6.1            | 6.0          | <0.0001 |
| HbA1c measurements during exposure period | 3.8±1.8    | 3.3±1.7     | 3.6±1.7        | 3.7±1.8        | 4.1±1.9        | 4.0±2.1      | <0.0001 |

Supplemental table S2. Characteristics of the study population according to levels of metabolic control in the 36 months after diagnosis of T2D.

| VARIABLE                                  | Total      | HbA1c <5.7% | HbA1c 5.7-6.4% | HbA1c 6.5-7.0% | HbA1c 7.1-8.0% | HbA1c >8.0%  | p-value |
|-------------------------------------------|------------|-------------|----------------|----------------|----------------|--------------|---------|
| No. of patients                           | 210385     | 4.9         | 64265 (30.5)   | 55468 (26.4)   | 53934 (25.6)   | 26428 (12.6) |         |
| Age at baseline (year)                    | 64.8±12.2  | 61.6±13.1   | 65.0±11.6      | 65.9±11.6      | 65.3±12.3      | 62.5±13.4    | <0.0001 |
| Gender (% males)                          | 56.4       | 63.4        | 56.7           | 54.3           | 56.3           | 57.9         | <0.0001 |
| BMI (kg/m <sup>2</sup> )                  | 30.0±5.6   | 29.2±5.4    | 29.6±5.4       | 30.0±5.4       | 30.2±5.7       | 30.7±6.1     | <0.0001 |
| Smoking (%)                               | 19.8       | 16.0        | 17.6           | 19.1           | 21.5           | 25.5         | <0.0001 |
| HbA1c at baseline (%)                     | 6.8±1.1    | 5.4±0.4     | 6.1±0.4        | 6.7±0.5        | 7.2±0.8        | 8.5±1.7      | <0.0001 |
| HbA1c at diagnosis (%)                    | 8.2±2.2    | 7.4±2.3     | 7.6±2.0        | 7.9±2.0        | 8.7±2.2        | 9.7±2.4      | <0.0001 |
| Total cholesterol (mg/dl)                 | 182.4±39.0 | 179.8±37.2  | 182.3±37.7     | 182.1±38.3     | 181.0±39.2     | 187.0±43.1   | <0.0001 |
| HDL cholesterol (mg/dl)                   | 49.5±13.4  | 50.7±14.3   | 51.0±13.5      | 49.9±13.1      | 48.3±13.0      | 46.6±13.1    | <0.0001 |
| LDL cholesterol (mg/dl)                   | 105.3±33.7 | 104.5±32.4  | 105.6±32.8     | 105.0±33.3     | 103.9±33.8     | 108.2±36.5   | <0.0001 |
| Triglycerides (mg/dl)                     | 143.1±86.8 | 126.6±76.7  | 132.0±74.1     | 140.6±79.2     | 149.4±89.5     | 169.1±117.1  | <0.0001 |
| Systolic blood pressure (mmHg)            | 134.4±17.8 | 131.9±17.5  | 133.6±17.5     | 134.4±17.6     | 135.2±18.1     | 135.2±18.7   | <0.0001 |
| Diastolic blood pressure (mmHg)           | 78.8±9.7   | 78.0±9.6    | 78.4±9.5       | 78.7±9.6       | 79.0±9.8       | 79.7±10.3    | <0.0001 |
| Albuminuria (%)                           | 39.4       | 33.6        | 36.1           | 38.0           | 41.8           | 48.0         | <0.0001 |
| eGFR <60 ml/min/1.73m <sup>2</sup> (%)    | 21.6       | 18.1        | 20.4           | 21.8           | 23.1           | 22.5         | <0.0001 |
| Antihypertensive medication (%)           | 55.0       | 50.1        | 55.8           | 57.4           | 55.5           | 48.8         | <0.0001 |
| Lipid-lowering medication (%)             | 45.1       | 34.8        | 44.9           | 48.2           | 46.9           | 39.5         | <0.0001 |
| Glucose-lowering medication (%)           |            |             |                |                |                |              |         |
| Metformin                                 | 65.3       | 49.3        | 55.3           | 66.1           | 75.7           | 73.1         | <0.0001 |
| Sulphonylureas                            | 13.2       | 5.7         | 6.2            | 9.3            | 19.3           | 28.7         | <0.0001 |
| Glinides                                  | 4.4        | 2.2         | 2.8            | 3.6            | 6.1            | 7.5          | <0.0001 |
| DPP4i                                     | 11.9       | 4.5         | 5.7            | 9.5            | 19.9           | 18.4         | <0.0001 |
| GLP1-RAs                                  | 3.5        | 1.4         | 1.5            | 2.4            | 5.6            | 7.2          | <0.0001 |
| SGLT2i                                    | 3.9        | 1.1         | 1.7            | 3.1            | 5.9            | 8.0          | <0.0001 |
| Thiazolidinediones                        | 3.3        | 1.4         | 1.9            | 2.7            | 4.9            | 5.5          | <0.0001 |
| Acarbose                                  | 2.3        | 1.1         | 1.4            | 2.1            | 3.2            | 3.4          | <0.0001 |
| Insulin                                   | 18.6       | 13.0        | 9.1            | 11.2           | 23.6           | 49.3         | <0.0001 |
| Follow-up (years)                         | 4.3±2.5    | 4.3±2.5     | 4.3±2.4        | 4.3±2.4        | 4.2±2.4        | 4.3±2.5      | <0.0001 |
| Composite CV Outcome                      | 5.3        | 3.3         | 4.6            | 5.4            | 6.0            | 6.1          | <0.0001 |
| HbA1c measurements during exposure period | 5.0±2.6    | 4.3±2.3     | 4.7±2.4        | 4.9±2.5        | 5.5±2.6        | 5.2±3.0      | <0.0001 |
