# Supplementary material
Source: publisher figshare collection journal article supplement (https://diabetesjournals.figshare.com/articles/dataset/_/27234243)
Supplement: Supplementary file 2 [file 1]

Supplemental Table S3 - Results of Cox models with backward variables selection in the three different periods of exposure

| <b>1 year exposure</b>                        | <b>HR (95% CI)</b> | <b>p-value</b> |
|-----------------------------------------------|--------------------|----------------|
| HbA1c (%) 5.7-6.4 vs <5.7                     | 1.24 ( 1.13-1.35)  | <.0001         |
| HbA1c (%) 6.5-7.0 vs <5.7                     | 1.42 ( 1.30-1.56)  | <.0001         |
| HbA1c (%) 7.1-8.0 vs <5.7                     | 1.49 ( 1.36-1.64)  | <.0001         |
| HbA1c (%) >8.0 vs <5.7                        | 1.56 ( 1.42-1.72)  | <.0001         |
| eGFR (ml/min/1.73m <sup>2</sup> ) < 60 vs ≥60 | 1.18 ( 1.12-1.23)  | <.0001         |
| Male vs Female                                | 2.53 ( 2.42-2.63)  | <.0001         |
| Glinides Yes vs No                            | 0.84 ( 0.77-0.91)  | <.0001         |
| Thiazolidinediones Yes vs No                  | 0.52 ( 0.45-0.61)  | <.0001         |
| GLP1-RAs Yes vs No                            | 1.23 ( 1.08-1.41)  | 0.0027         |
| Insulin Yes vs No                             | 1.23 ( 1.18-1.29)  | <.0001         |
| Metformin Yes vs No                           | 0.82 ( 0.79-0.85)  | <.0001         |
| SGLT2i Yes vs No                              | 2.10 ( 1.88-2.35)  | <.0001         |
| Microalbuminuria Yes vs No                    | 1.10 ( 1.05-1.15)  | <.0001         |
| Antihypertensive medication Yes vs No         | 1.48 ( 1.42-1.54)  | <.0001         |
| Statins Yes vs No                             | 2.04 ( 1.96-2.12)  | <.0001         |
| Smoking Yes vs No                             | 1.10 ( 1.04-1.16)  | 0.0004         |
| Age (in years) by 5                           | 1.15 ( 1.14-1.16)  | <.0001         |
| BMI                                           | 0.99 ( 0.98-0.99)  | <.0001         |
| Diastolic blood pressure (mmHg) by 5          | 0.96 ( 0.95-0.96)  | <.0001         |
| Total cholesterol (mmol/l) by 10              | 0.97 ( 0.96-0.98)  | <.0001         |
| HDL cholesterol (mmol/l) by 10                | 0.85 ( 0.84-0.87)  | <.0001         |
| LDL cholesterol (mmol/l) by 10                | 0.94 ( 0.93-0.95)  | <.0001         |

| <b>2 year exposure</b>                    | <b>HR (95% CI)</b> | <b>p-value</b> |
|-------------------------------------------|--------------------|----------------|
| HbA1c (%) 5.7-6.4 vs <5.7                 | 1.27 ( 1.16-1.41)  | <.0001         |
| HbA1c (%) 6.5-7.0 vs <5.7                 | 1.40 ( 1.27-1.55)  | <.0001         |
| HbA1c (%) 7.1-8.0 vs <5.7                 | 1.54 ( 1.40-1.71)  | <.0001         |
| HbA1c (%) >8.0 vs <5.7                    | 1.66 ( 1.49-1.84)  | <.0001         |
| HbA1c at diagnosis (%) 7.0-8.0 vs 3.0-6.9 | 0.99 ( 0.93-1.06)  | 0.8489         |
| HbA1c at diagnosis (%) 8.1-9.0 vs 3.0-6.9 | 1.03 ( 0.95-1.11)  | 0.5382         |
| HbA1c at diagnosis (%) >9.0 vs 3.0-6.9    | 0.98 ( 0.92-1.05)  | 0.6488         |
| HbA1c at diagnosis (%) NA vs 3.0-6.9      | 1.05 ( 1.00-1.11)  | 0.0389         |
| eGFR (ml/min/1.73m2) < 60 vs ≥60          | 1.21 ( 1.15-1.26)  | <.0001         |
| Male vs Female                            | 2.59 ( 2.48-2.71)  | <.0001         |
| Glinides Yes vs No                        | 0.90 ( 0.84-0.97)  | 0.0078         |
| Thiazolidinediones Yes vs No              | 0.61 ( 0.53-0.69)  | <.0001         |
| GLP1-RAs Yes vs No                        | 1.16 ( 1.03-1.31)  | 0.0169         |
| Insulin Yes vs No                         | 1.20 ( 1.15-1.26)  | <.0001         |
| Metformin Yes vs No                       | 0.87 ( 0.83-0.90)  | <.0001         |
| SGLT2i Yes vs No                          | 1.85 ( 1.65-2.09)  | <.0001         |
| Microalbuminuria Yes vs No                | 1.07 ( 1.02-1.11)  | 0.0034         |
| Antihypertensive medication Yes vs No     | 1.56 ( 1.50-1.63)  | <.0001         |
| Statins Yes vs No                         | 2.03 ( 1.95-2.11)  | <.0001         |
| Smoking Yes vs No                         | 1.11 ( 1.05-1.17)  | 0.0001         |
| Age (in years) by 5                       | 1.15 ( 1.14-1.16)  | <.0001         |
| BMI                                       | 0.99 ( 0.98-0.99)  | <.0001         |
| Diastolic blood pressure (mmHg) by 5      | 0.95 ( 0.94-0.96)  | <.0001         |
| Total cholesterol (mmol/l) by 10          | 0.98 ( 0.97-0.99)  | <.0001         |
| HDL cholesterol (mmol/l) by 10            | 0.85 ( 0.84-0.87)  | <.0001         |
| LDL cholesterol (mmol/l) by 10            | 0.93 ( 0.92-0.94)  | <.0001         |
| HbA1c measurements during exposure period | 1.03 ( 1.02-1.04)  | <.0001         |

| <b>3 year exposure</b>                    | <b>HR (95% CI)</b> | <b>p-value</b> |
|-------------------------------------------|--------------------|----------------|
| HbA1c (%) 5.7-6.4 vs <5.7                 | 1.27 ( 1.13-1.42)  | <.0001         |
| HbA1c (%) 6.5-7.0 vs <5.7                 | 1.43 ( 1.28-1.60)  | <.0001         |
| HbA1c (%) 7.1-8.0 vs <5.7                 | 1.60 ( 1.42-1.79)  | <.0001         |
| HbA1c (%) >8.0 vs <5.7                    | 1.77 ( 1.57-2.00)  | <.0001         |
| HbA1c at diagnosis (%) 7.0-8.0 vs 3.0-6.9 | 1.02 ( 0.95-1.09)  | 0.5833         |
| HbA1c at diagnosis (%) 8.1-9.0 vs 3.0-6.9 | 1.03 ( 0.94-1.12)  | 0.5073         |
| HbA1c at diagnosis (%) >9.0 vs 3.0-6.9    | 1.01 ( 0.94-1.09)  | 0.7218         |
| HbA1c at diagnosis (%) NA vs 3.0-6.9      | 1.08 ( 1.02-1.14)  | 0.0048         |
| eGFR (ml/min/1.73m2) < 60 vs ≥60          | 1.19 ( 1.13-1.25)  | <.0001         |
| Male vs Female                            | 2.65 ( 2.53-2.78)  | <.0001         |
| Glinides Yes vs No                        | 0.90 ( 0.83-0.97)  | 0.0077         |
| Thiazolidinediones Yes vs No              | 0.63 ( 0.55-0.70)  | <.0001         |
| Insulin Yes vs No                         | 1.20 ( 1.14-1.27)  | <.0001         |
| Metformin Yes vs No                       | 0.86 ( 0.83-0.90)  | <.0001         |
| SGLT2i Yes vs No                          | 1.70 ( 1.50-1.92)  | <.0001         |
| Microalbuminuria Yes vs No                | 1.07 ( 1.02-1.12)  | 0.0028         |
| Antihypertensive medication Yes vs No     | 1.64 ( 1.56-1.72)  | <.0001         |
| Statins Yes vs No                         | 2.11 ( 2.02-2.21)  | <.0001         |
| Smoking Yes vs No                         | 1.09 ( 1.03-1.15)  | 0.0041         |
| Age (in years) by 5                       | 1.14 ( 1.13-1.16)  | <.0001         |
| BMI                                       | 0.99 ( 0.98-0.99)  | <.0001         |
| Systolic blood pressure (mmHg) by 5       | 0.99 ( 0.99-1.00)  | 0.0211         |
| Diastolic blood pressure (mmHg) by 5      | 0.95 ( 0.94-0.97)  | <.0001         |
| Total cholesterol (mmol/l) by 10          | 0.98 ( 0.97-0.99)  | <.0001         |
| HDL cholesterol (mmol/l) by 10            | 0.85 ( 0.84-0.87)  | <.0001         |
| LDL cholesterol (mmol/l) by 10            | 0.93 ( 0.92-0.95)  | <.0001         |
| HbA1c measurements during exposure period | 1.04 ( 1.03-1.05)  | <.0001         |
